# Supplementary material for: Biochar-mediated changes in nutrient distribution and leaching patterns: insights from a soil column study
Source: PeerJ. 2025 May 28;13:e18823. doi: 10.7717/peerj.18823 (PMC12126088; doi:10.7717/peerj.18823)
Supplement: Supplemental Information 1 [file peerj-13-18823-s001.xlsx]

## Sheet: Soil Column Samples
Biochar Dose	Depth	pH	EC	OM %	P2O5 mg/kg	K mg/kg	Ca mg/kg	Mg mg/kg	Na mg/kg	Fe mg/kg	Cu mg/kg	Zn mg/kg	Mn mg/kg	Nitrate mg/kg	Ammonium mg/kg
0	1	7.74	357	0.696261	26.53	188.345	5985.38	465.045	486.971	39.1658	3.58063	1.40667	6.59389	190.933	55.57
0	2	7.87	390	0.634916	34.3118	190.446	6097.53	544.858	486.679	36.8072	3.57725	1.28888	5.89294	46.0085	30.1931
0	3	7.82	506	0.726933	30.4209	206.39	6356.85	579.392	483.304	37.7884	3.77931	1.36544	6.10186	99.7112	65.9854
0	1	7.83	312	0.634916	30.0966	183.772	6038.04	502.667	472.793	38.4685	3.55373	1.37121	6.11928	79.0409	55.0463
0	2	7.86	368	0.573572	33.6633	73.4405	1723.76	114.774	428.705	39.1239	3.50683	1.34352	5.94141	88.6099	64.3136
0	3	7.96	416	1.12567	26.8542	193.93	6632.1	614.876	522.246	37.0516	3.74071	1.40016	6.82605	151.126	60.1421
0	1	7.85	298	1.13181	33.9875	178.037	5872.04	479.674	439.691	39.6239	3.51386	1.4192	6.27745	46.0546	47.4939
0	2	7.87	352	0.806681	21.0179	182.259	6174.21	559.675	445.023	39.0727	3.49959	1.28435	5.88219	63.268	150.98
0	3	7.89	479	0.76374	31.7179	191.49	6159.86	555.096	454.009	37.2826	3.86986	1.32935	6.03151	56.9956	121.491
0.5	1	7.82	404	1.2637	45.7593	425.232	5945.85	518.366	452.706	37.8469	4.14022	1.61666	6.86122	99.9449	233.695
0.5	2	7.82	362	0.641051	24.5845	197.79	6172.65	553.731	495.654	38.367	3.54257	1.42441	6.21331	71.7846	142.134
0.5	3	7.88	436	0.512227	24.9088	198.861	6374.84	565.499	465.833	37.8485	3.46525	1.33938	6.06144	38.2175	110.243
0.5	1	7.94	352	0.886429	35.933	485.368	6216.66	517.475	468.138	39.2802	4.12258	1.58869	7.0305	126.068	197.898
0.5	2	7.9	361	0.622647	30.0966	200.049	6284.33	572.567	492.792	38.6691	3.59947	1.35857	5.99737	123.517	30.1612
0.5	3	7.96	431	1.04592	40.4724	183.612	6235.53	553.559	456.151	37.7125	3.61121	1.3798	5.89662	75.8221	68.2398
0.5	1	7.96	301	1.11954	39.8239	482.253	6256.71	547.873	414.436	36.991	3.63834	1.4248	6.15559	55.2301	196.212
0.5	2	7.91	367	0.950841	33.3391	203.635	5982.59	528.891	468.23	36.8136	3.53413	1.37963	5.45522	80.3224	107.575
0.5	3	7.93	456	0.751471	26.2058	193.113	5798.02	534.384	479.506	36.1731	3.51972	1.31287	5.592	102.729	104.24
1	1	8.05	336	1.095	38.8512	664.585	5516.84	495.541	436.591	34.1212	3.54818	1.50138	6.91019	352.244	49.2544
1	2	7.86	357	0.634916	24.9088	257.078	6205.28	548.258	559.106	36.1741	3.16064	1.26218	5.4161	609.691	72.6501
1	3	7.88	450	0.754538	24.5845	198.251	6392.43	553.407	471.13	37.0034	3.95931	1.39676	6.33419	484.338	31.7847
1	1	7.97	334	1.10727	43.7148	660.228	5601.56	499.057	458.318	40.6068	3.76768	1.63003	8.04638	48.5417	86.4648
1	2	7.84	355	0.726933	27.5027	203.198	6057.7	520.437	446.567	39.3065	3.50956	1.32864	6.5932	20.2419	30.3629
1	3	7.86	477	0.800546	33.6633	199.017	6224.33	549.317	491.818	53.5176	4.47842	1.32447	9.71723	48.563	50.0806
1	1	8.01	349	0.772941	44.3633	684.014	6142.27	548.787	454.359	37.0075	3.18942	1.46488	7.60457	40.2083	134.543
1	2	7.91	388	0.641051	34.3118	223.18	6147.83	560.501	477.297	37.3546	3.40211	1.31858	5.85232	46.6237	109.274
1	3	7.9	453	0.834286	25.5573	192.123	6223.45	558.313	479.615	39.2407	3.69524	1.43153	7.32188	58.6765	50.9559
2	1	8.05	503	1.2637	44.6875	1210.72	5651.62	578.948	526.984	38.8275	3.37994	1.66537	12.1261	273.571	91.7269
2	2	7.89	349	0.726933	26.2058	238.163	5504.08	523.17	505.509	40.8674	3.79408	1.48501	9.03034	306.032	125.588
2	3	7.88	333	0.696261	28.4754	203.663	6274.45	563.169	489.208	45.265	3.88487	1.38666	8.94347	47.6524	40.2067
2	1	8.21	454	1.21155	48.9026	1322.99	5692	585.682	463.428	36.6463	3.68236	1.69805	10.5443	72.514	74.1621
2	2	7.93	336	0.858824	24.9088	257.218	6495.56	553.825	475.185	37.9252	3.77398	1.45682	7.38362	71.7888	30.1513
2	3	8.87	470	0.877227	26.8542	199.79	6237.98	569.886	499.989	37.0422	3.5171	1.40532	6.83677	102.786	149.645
2	1	8.2	400	1.11954	35.933	1097.48	5759.67	555.745	449.361	38.2788	3.50112	1.68818	8.59942	67.4074	68.9394
2	2	7.92	342	0.714664	28.7997	199.398	6103.8	549.088	491.448	39.7489	3.92068	1.40369	7.87113	62.3662	55.2791
2	3	7.82	427	0.662521	30.0966	208.515	6135.3	547.062	422.502	39.1074	3.61424	1.4452	8.00229	73.9583	84.3125

## Sheet: ANOVA_HID
	Category	LS mean	Standard error
	0	7.85444	0.0591321
	0,5	7.90222	0.0591321
	1	7.92	0.0591321
	2	8.08556	0.0591321
	Biochar Dose\Derinlik	1	2	3
	0	7.80667	7.86667	7.89
	0,5	7.90667	7.87667	7.92333
	1	8.01	7.87	7.88
	2	8.15333	7.91333	8.19
	Category	LS mean	Standard error
	1	7.96917	0.0512099
	2	7.88167	0.0512099
	3	7.97083	0.0512099
	Derinlik\Biochar Dose	0	0,5	1	2
	1	7.80667	7.90667	8.01	8.15333
	2	7.86667	7.87667	7.87	7.91333
	3	7.89	7.92333	7.88	8.19

## Sheet: ANOVA_HID1
	Category	LS mean	Standard error
	0	386.444	11.5944
	0,5	385.556	11.5944
	1	388.778	11.5944
	2	401.556	11.5944
	Biochar Dose\Derinlik	1	2	3
	0	322.333	370	467
	0,5	352.333	363.333	441
	1	339.667	366.667	460
	2	452.333	342.333	410
	Category	LS mean	Standard error
	1	366.667	10.041
	2	360.583	10.041
	3	444.5	10.041
	Derinlik\Biochar Dose	0	0,5	1	2
	1	322.333	352.333	339.667	452.333
	2	370	363.333	366.667	342.333
	3	467	441	460	410

## Sheet: ANOVA_HID2
	Category	LS mean	Standard error
	0	0.788277	0.0563962
	0,5	0.865981	0.0563962
	1	0.818609	0.0563962
	2	0.903469	0.0563962
	Biochar Dose\Derinlik	1	2	3
	0	0.820995	0.671723	0.872115
	0,5	1.08989	0.738179	0.769874
	1	0.991737	0.667633	0.796457
	2	1.19826	0.766807	0.745336
	Category	LS mean	Standard error
	1	1.02522	0.0488406
	2	0.711086	0.0488406
	3	0.795946	0.0488406
	Derinlik\Biochar Dose	0	0,5	1	2
	1	0.820995	1.08989	0.991737	1.19826
	2	0.671723	0.738179	0.667633	0.766807
	3	0.872115	0.769874	0.796457	0.745336

## Sheet: ANOVA_HID3
	Category	LS mean	Standard error
	0	29.8445	1.67474
	0,5	33.4581	1.67474
	1	33.0508	1.67474
	2	32.7626	1.67474
	Biochar Dose\Derinlik	1	2	3
	0	30.2047	29.6643	29.6643
	0,5	40.5054	29.3401	30.529
	1	42.3097	28.9078	27.935
	2	43.1744	26.6381	28.4754
	Category	LS mean	Standard error
	1	39.0486	1.45037
	2	28.6376	1.45037
	3	29.1509	1.45037
	Derinlik\Biochar Dose	0	0,5	1	2
	1	30.2047	40.5054	42.3097	43.1744
	2	29.6643	29.3401	28.9078	26.6381
	3	29.6643	30.529	27.935	28.4754

## Sheet: ANOVA_HID4
	Category	LS mean	Standard error
	0	176.457	13.6384
	0,5	285.546	13.6384
	1	364.63	13.6384
	2	548.66	13.6384
	Biochar Dose\Derinlik	1	2	3
	0	183.385	148.715	197.27
	0,5	464.284	200.491	191.862
	1	669.609	227.819	196.464
	2	1210.4	231.593	203.989
	Category	LS mean	Standard error
	1	631.919	11.8112
	2	202.155	11.8112
	3	197.396	11.8112
	Derinlik\Biochar Dose	0	0,5	1	2
	1	183.385	464.284	669.609	1210.4
	2	148.715	200.491	227.819	231.593
	3	197.27	191.862	196.464	203.989

## Sheet: ANOVA_HID5
	Category	LS mean	Standard error
	0	5671.09	256.11
	0,5	6140.8	256.11
	1	6056.85	256.11
	2	5983.83	256.11
	Biochar Dose\Derinlik	1	2	3
	0	5965.15	4665.17	6382.93
	0,5	6139.74	6146.52	6136.13
	1	5753.56	6136.94	6280.07
	2	5701.1	6034.48	6215.91
	Category	LS mean	Standard error
	1	5889.89	221.798
	2	5745.78	221.798
	3	6253.76	221.798
	Derinlik\Biochar Dose	0	0,5	1	2
	1	5965.15	6139.74	5753.56	5701.1
	2	4665.17	6146.52	6136.94	6034.48
	3	6382.93	6136.13	6280.07	6215.91

## Sheet: ANOVA_HID6
	Category	LS mean	Standard error
	0	490.673	25.1162
	0,5	543.594	25.1162
	1	537.069	25.1162
	2	558.508	25.1162
	Biochar Dose\Derinlik	1	2	3
	0	482.462	406.436	583.121
	0,5	527.905	551.73	551.147
	1	514.462	543.065	553.679
	2	573.458	542.028	560.039
	Category	LS mean	Standard error
	1	524.572	21.7513
	2	510.815	21.7513
	3	561.997	21.7513
	Derinlik\Biochar Dose	0	0,5	1	2
	1	482.462	527.905	514.462	573.458
	2	406.436	551.73	543.065	542.028
	3	583.121	551.147	553.679	560.039

## Sheet: ANOVA_HID7
	Category	LS mean	Standard error
	0	468.824	10.1433
	0,5	465.938	10.1433
	1	474.978	10.1433
	2	480.402	10.1433
	Biochar Dose\Derinlik	1	2	3
	0	466.485	453.469	486.519
	0,5	445.093	485.559	467.163
	1	449.756	494.323	480.855
	2	479.924	490.714	470.566
	Category	LS mean	Standard error
	1	460.315	8.78436
	2	481.016	8.78436
	3	476.276	8.78436
	Derinlik\Biochar Dose	0	0,5	1	2
	1	466.485	445.093	449.756	479.924
	2	453.469	485.559	494.323	490.714
	3	486.519	467.163	480.855	470.566

## Sheet: ANOVA_HID8
	Category	LS mean	Standard error
	0	38.265	1.05645
	0,5	37.7446	1.05645
	1	39.3703	1.05645
	2	39.301	1.05645
	Biochar Dose\Derinlik	1	2	3
	0	39.0861	38.3346	37.3742
	0,5	38.0394	37.9499	37.2447
	1	37.2452	37.6117	43.2539
	2	37.9175	39.5139	40.4715
	Category	LS mean	Standard error
	1	38.072	0.914915
	2	38.3525	0.914915
	3	39.5861	0.914915
	Derinlik\Biochar Dose	0	0,5	1	2
	1	39.0861	38.0394	37.2452	37.9175
	2	38.3346	37.9499	37.6117	39.5139
	3	37.3742	37.2447	43.2539	40.4715

[truncated: 61 more sheets: ANOVA_HID9, ANOVA_HID10, ANOVA_HID11, ANOVA_HID12, ANOVA_HID13, ANOVA1_HID, ANOVA1_HID1, ANOVA1_HID2, ANOVA1_HID3, ANOVA1_HID4, ANOVA1_HID5, ANOVA1_HID6, ANOVA1_HID7, ANOVA1_HID8, ANOVA1_HID9, ANOVA1_HID10, ANOVA1_HID11, ANOVA1_HID12, ANOVA1_HID13, ANOVA1_HID14 …]
